# Supplementary material
Source: HighWire-hosted journal article supplement (https://molpharm.aspetjournals.org/content/suppl/2013/03/11/mol.112.084293)
Supplement: FIG_S1.pdf [file FIG_S1.pdf]

# CUCURBITACIN I INHIBITS RAC1 ACTIVATION IN BREAST CANCER CELLS BY A ROS-MEDIATED MECHANISM AND INDEPENDENTLY OF JAK2 AND P-REX1

Cynthia Lopez-Haber and Marcelo G. Kazanietz

Molecular Pharmacology

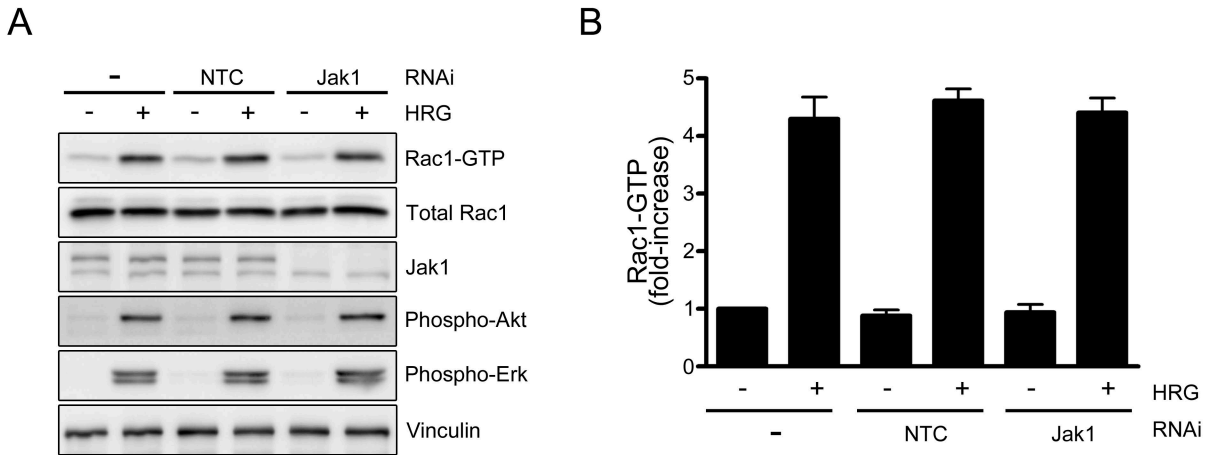

MCF-7 cells were transfected with RNAi duplexes for Jak1 or non-target control (*NTC*). After 24 h cells were serum-starved for 48 h and then treated with HRG (10 ng/ml, 5 min). *Panel A*. Rac1-GTP levels were determined using a pull-down assay. *Panel B*. Densitometric values of Rac1-GTP levels (normalized to total Rac1) are presented as mean  $\pm$  S.D. (n=3).
